# Supplementary material for: Aminoacid N-substituted 1,4,7-triazacyclononane and 1,4,7,10-tetraazacyclododecane Zn2+, Cd2+ and Cu2+ complexes. A preparative, potentiometric titration and NMR spectroscopic studyElectronic supplementary information (ESI) available: Titration curve for H333+ alone and in the presence of Zn2+, Cd2+ and Cu2+. Fig. S2: Distribution variation of 3 and derived species with pH in the presence of Zn2+. See http://www.rsc.org/suppdata/dt/b4/b401763c/
Source: Royal Society of Chemistry journal article supplement (doi:10.1039/b401763c), 2004-01-01
Supplement: b401763c.doc [file b401763c.doc]

**Aminoacid *N*-substituted 1,4,7-triazacyclononane and 1,4,7,10-tetraazacyclododecane Zn2+, Cd2+ and Cu2+ complexes. A preparative, potentiometric titration and NMR spectroscopic study.**

**Sally E. Plush**,*a* **Stephen F. Lincoln*a**** **and Kevin P. Wainwright***b*

*aDepartment of Chemistry, The University of Adelaide, Adelaide, SA 5005, Australia. E-mail: Stephen.Lincoln@adelaide.edu.au*

*bSchool of Chemistry, Physics and Earth Sciences, The Flinders University of South Australia, GPO Box 2100, Adelaide, SA 5001, Australia.*

**Fig. S1.** Titration curve for H3**3**3+, formed in a solution, where [**3**]total = 7.30 x 10-4 and [HClO4]total= 3.10 x 10-3 mol dm-3 in [**3**]total at 298.2 K and *I* = 0.10 mol dm-3 (NEt4ClO4). Titration curves are also shown for the same solution, except that it was also 8.00 x 10-4 mol dm-3 in either [Zn2+]total, [Cd2+]total or [Cu2+]total, up to the pH just below that at which precipitation of the metal complex or hydroxide occurred. Titrant [NEt4OH] = 0.103 mol dm-3.

**Fig. S2.** Distribution variation of **3** and derived species with pH, at 298.2 K, for a solution in which [**3**]total = 7.30 x 10-4 mol dm-3, [Zn2+]total = 1.03 x 10-3 mol dm-3, *I* = 0.10 mol dm-3 (NEt4ClO4) and for which 100% = [**3**]total
